# Supplementary material for: Neuroprotective Effects of A Standardized Flavonoid Extract of Safflower Against Neurotoxin-Induced Cellular and Animal Models of Parkinson’s Disease
Source: PubMed Central journal article supplement (PMC4764910; doi:10.1038/srep22135), 2016-02-24
Supplement: srep22135-s1.pdf [file srep22135-s1.pdf]

Neuroprotective Effects of a standardized flavonoid extract of safflower against  
Neurotoxin-Induced Cellular and Animal Models of Parkinson's Disease

Rutong Ren<sup>a, b</sup>, Chunyan Shi<sup>c, d</sup>, Jing Cao<sup>b</sup>, Yi Sun<sup>a, b</sup>, Xin Zhao<sup>a, b</sup>, Chen Wang<sup>a, b</sup>, Yongfei Guo<sup>a, b</sup>,  
Hui Lei<sup>a, b</sup>, Hanjie Jiang<sup>a, b</sup>, Nuramatjan Ablat<sup>a, b</sup>, Jiamin Xu<sup>a, b</sup>, Wan Li<sup>a, b</sup>, Yingcong Ma<sup>b</sup>,  
Xianrong Qi<sup>b</sup>, Min Ye<sup>b</sup>, Xiaoping Pu<sup>a, b, \*</sup>, Hongbin Han<sup>c, d, \*</sup>

a Department of Molecular and Cellular Pharmacology, School of Pharmaceutical Sciences,  
Peking University, Beijing 100191, China

b State Key Laboratory of Natural and Biomimetic Drugs, Peking University, Beijing 100191,  
China

c Beijing Key Lab of MRI Device and Technique, Beijing 100191, China

d Department of Radiology, Peking University Third Hospital, Beijing 100191, China

\*Corresponding author:

Xiaoping Pu, E-mail: pxp123@bjmu.edu.cn

Hongbin Han, E-mail: hanhongbin@bjmu.edu.cn

Table S1 | The important parameters for evaluating ECS

| Symbol    | Name                            | Unit                   | Definition                                                                                                                                                             |
|-----------|---------------------------------|------------------------|------------------------------------------------------------------------------------------------------------------------------------------------------------------------|
| $\alpha$  | Volume fraction                 | Dimensionless          | Ratio of the ECS occupies of the total brain volume                                                                                                                    |
| $D^*$     | Effective diffusion coefficient | $\text{mm}^2/\text{s}$ | $D^* = D\lambda^2$ , Diffusion rate of a substance in a diffusion-limited medium, such as the brain                                                                    |
| $\lambda$ | Tortuosity                      | Dimensionless          | Pathway of a substance diffusing from one point to another in the brain ECS, the length is equal to or longer than the straight line distance between these two points |
| $k^?$     | Clearance                       | Mmol/L                 | Loss or clearance of a substance from the ECS, into cells, across the blood brain barrier (BBB), or by degradation through enzymatic attack or other processes         |

D is a free diffusion coefficient ( $\text{mm}^2/\text{s}$ ) and defined as diffusion rate of a substance in a free medium, such as the diluted agarose hydrogel.

RT: 0.00 - 61.70

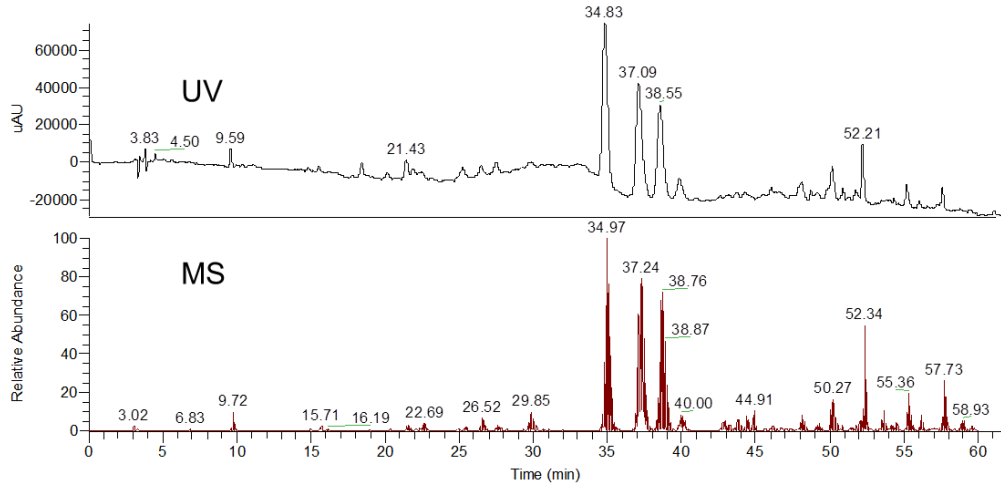

Figure S1 | The chromatogram and mass spectrum of SAFE.

Table S2 | The identified compounds in the SAFE with LC/MS analysis

| No. | RT(min) | [M-H] <sup>-</sup> (m/z) | MS <sup>n</sup> (m/z)                                                                                                                                 | Identification                                                                                                                 |
|-----|---------|--------------------------|-------------------------------------------------------------------------------------------------------------------------------------------------------|--------------------------------------------------------------------------------------------------------------------------------|
| 1   | 9.72    | 611                      | MS <sup>2</sup> [611]:491,473,325 MS <sup>3</sup> [491]:473,283                                                                                       | hydroxysafflor yellow A (HSYA)                                                                                                 |
| 2   | 14.93   | 771                      | MS <sup>2</sup> [771]:609,463,301 MS <sup>3</sup> [609]:301                                                                                           | 6-hydroxykaempferol 3-O-rutinoside-7-O-glucoside (6H3R7G) or 6-hydroxykaempferol 3-O-β-D-rutinoside-6-O-β-D-glucoside (6H3R6G) |
| 3   | 15.71   | 625                      | MS <sup>2</sup> [625]:463, MS <sup>3</sup> [463]:301                                                                                                  | 6-hydroxykaempferol 3,7-di-O-glucoside (6H3G) or 6-hydroxykaempferol 6,7-di-O-β-D-glucoside (6H6G)                             |
| 4   | 20.4    | 609                      | MS <sup>2</sup> [609]:301                                                                                                                             | 6-hydroxykaempferol 3-O-β-D-rutinoside (6H3R) or quercetin 3-O-rutinoside (rutin)                                              |
| 5   | 21.55   | 463 1087                 | MS <sup>2</sup> [463]:301; MS <sup>3</sup> [301]:255,271<br>MS <sup>2</sup> [1087]:625,461 MS <sup>3</sup> [625]:463,301<br>MS <sup>4</sup> [463]:301 | 6-hydroxykaempferol 3-O-β-D-glucoside (6HK3G)                                                                                  |
| 6   | 22.08   | 609                      | MS <sup>2</sup> [609]:429,284,339,447 MS <sup>3</sup> [284]:338                                                                                       | kaempferol 3-O-β-D-sophoroside (K3S)                                                                                           |
| 7   | 22.69   | 1043                     | MS <sup>2</sup> [1043]:1025,923,1007,449<br>MS <sup>3</sup> [1025]:1007,863,671<br>MS <sup>2</sup> [923]:449,527,759                                  | isomer of anhydrosafflor yellow B (AYB)                                                                                        |
| 8   | 21.34   | 609                      | MS <sup>2</sup> [609]:301,489,549,591<br>MS <sup>3</sup> [301]:273,255,179                                                                            | quercetin 3-O-rutinoside (rutin)                                                                                               |
| 9   | 26.52   | 1043                     | MS <sup>2</sup> [1043]:1025,923,1007,449<br>MS <sup>3</sup> [1025]:1007,863,671<br>MS <sup>2</sup> [923]:449,527,759                                  | isomer of anhydrosafflor yellow B (AYB)                                                                                        |
| 10  | 27.59   | 463                      | MS <sup>2</sup> [463]:301,180,393 MS <sup>3</sup> [301]:<br>179,254,271                                                                               | quercetin-3-O-glucoside (Q3G)                                                                                                  |

|    |       |      |                                                                                                                 |                                                                         |
|----|-------|------|-----------------------------------------------------------------------------------------------------------------|-------------------------------------------------------------------------|
| 11 | 29.69 | 449  | MS <sup>2</sup> [449]:287,255,167<br>MS <sup>3</sup> [287]:181,259,241                                          | 4',5-dihydroxyl-7-O-glucopyranosyl flavanone (4D7GF)                    |
| 12 | 34.97 | 593  | MS <sup>2</sup> [593]:285 MS <sup>3</sup> [285]:257,229,213,197                                                 | kaempferol 3-O-rutinoside (K3R)                                         |
| 13 | 37.24 | 623  | MS <sup>2</sup> [623]:315, 300 MS <sup>3</sup> [315]:300                                                        | 6-hydroxyapigenin 6-O-β-D-glucoside-7-O-β-D-glucuronide (6H6G7G)        |
| 14 | 38.76 | 1043 | MS <sup>2</sup> [1043]:1025,923,449<br>MS <sup>3</sup> [1025]:1007,863<br>MS <sup>4</sup> [863]:845,671,771,287 | anhydrosafflor yellow B (AYB)                                           |
| 15 | 40    | 447  | MS <sup>2</sup> [447]:315, 300 MS <sup>3</sup> [315]:300                                                        | kaempferol 3-O-glucoside (K3G)                                          |
| 16 | 43.78 | 449  | MS <sup>2</sup> [449]:287, 253 MS <sup>3</sup> [287]:181,167                                                    | 4',5-dihydroxyl-6-O-glucopyranosyl<br>flavanone (4D6GF) or its isomer   |
| 17 | 44.43 | 449  | MS <sup>2</sup> [449]:287, 253 MS <sup>3</sup> [287]:181,167                                                    | 4',5-dihydroxyl-6-O-glucopyranosyl<br>flavanone (4D6GF) or its isomer   |
| 18 | 44.91 | 836  | MS <sup>2</sup> [836]:790 MS <sup>3</sup> [790]:772,564,451                                                     | isorhamnetin                                                            |
| 19 | 51.47 | 491  | MS <sup>2</sup> [491]:287 ,181,431 MS <sup>3</sup> [287]:181,259                                                | 4',5-dihydroxyl-7-O-[6''-acetyl(1→6)]-glucopyranosyl flavanone (4D76GF) |

Also, in the SAFE there are still some unknown compounds that still need identification

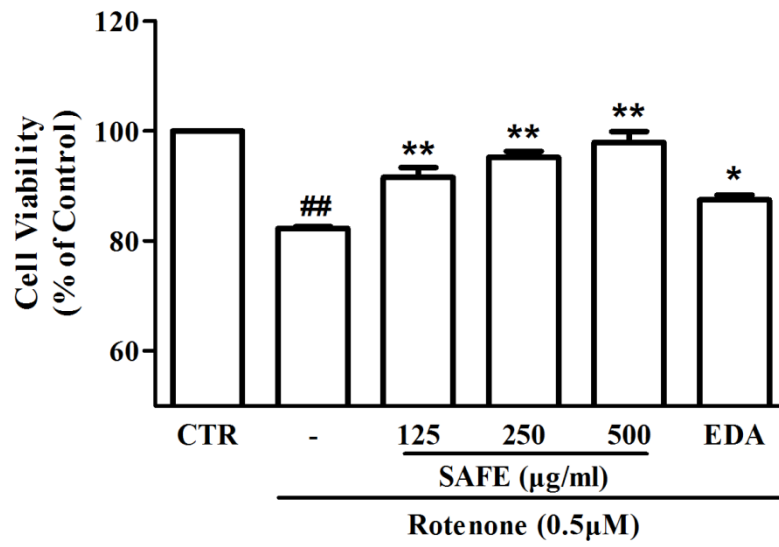

Figure S2 | Effects of SAFE on cell viability of rotenone-induced differentiated PC12 cell damage. Cells were pretreated with SAFE (125, 250 and 500 µg/ml) for 6 h before rotenone treatment for 24 h. Data are the mean ± SEM, n = 3, ## $P < 0.01$  vs. untreated control (CTR) group; \* $P < 0.05$ , \*\* $P < 0.01$  vs. rotenone group.

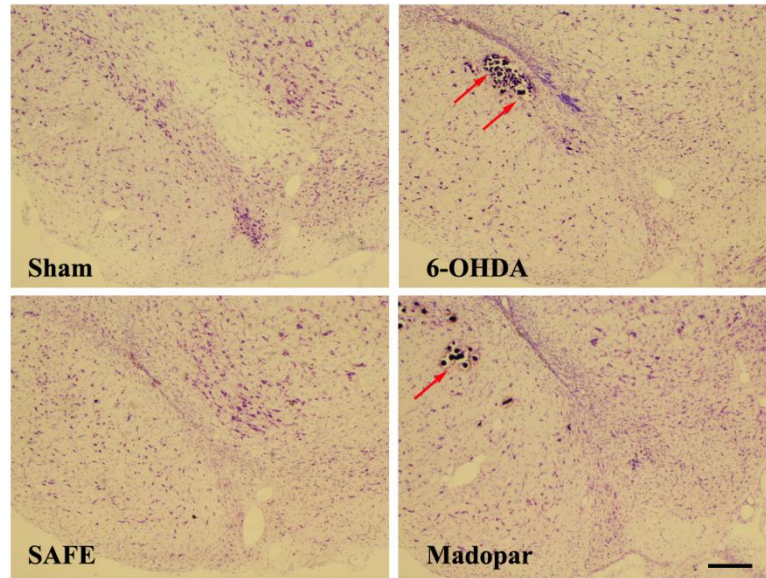

Figure S3 | Multiple foci of neuronophagia (solid arrows) as denoted by necrotic neurons surrounded or obscured by inflammatory cells. Bar = 200  $\mu$ m. The sections of SN were prepared and picked up as described as immunohistochemistry and then the sections was stained with 0.5% cresyl violet acetate in the SN.

**Apparatus and chromatographic conditions for HPLC and LC/MS.** An Agilent 1100 HPLC system equipped with a quaternary solvent delivery system, an autosampler and a DAD detector was used. Separation was achieved on an Alltima-C18 column (5  $\mu\text{m}$ , 250 mm  $\times$  4.6 mm, Agilent). The mobile phase consisted of A (0.3% aqueous methanoic acid) and B (Acetonitrile: methanol = 9:1), which were applied in the gradient elution as follows: 0-5 min: 10-14% B; 5-25 min: 14-17% B; 25-35 min: 17-18% B; 35-45 min: 18-25% B; 45-55 min: 25-30% B; 55-60 min: 30 % B. Each run was followed by equilibration time of 5 min. The flow rate was 1.0 ml/min. The column temperature was set at 30°C. Ultraviolet (UV) spectra were monitored at 345 nm. The injection volume was 10  $\mu\text{l}$ . The data were collected and analyzed with Chemstation 10.02 software.

For MS analysis, the HPLC conditions were the same as described and the mass spectrometer was operated in (-)-ESI mode. Ultra-high purity helium and high-purity nitrogen was used as the collision gas and the nebulizing gas, respectively. The optimized parameters were as follows: ion spray voltage, 3.5 KV; sheath gas, 50 arbitrary units; auxiliary gas, 10 arbitrary units; capillary temperature, 350  $^{\circ}\text{C}$ ; capillary voltage, -49.0 KV; tube lens offset voltage, -36.0 V. Mass spectra were recorded in the range of  $m/z$  130-1000. The collision-induced dissociation energy was adjusted to 40%, and the isolation width of precursor ions was 2.0 mass units. Data were processed by Xcalibur 1.4 software (ThermoFisher).
